# Supplementary material
Source: PubMed Central journal article supplement (PMC3246042)
Supplement: NIHMS293729-supplement-3.pdf [file NIHMS293729-supplement-3.pdf]

525  
526  
527  
528  
529  
530  
531  
532  
533  
534  
535  
536  
537  
538  
539  
540  
541  
542  
543  
544

APPENDIX

FIGURE CAPTION

Figure A1. Mean deviation (MD) and pattern standard deviation (PSD) for 4 example visual fields are plotted on Brusini and Filacorda’s enhanced Glaucoma Severity Staging (eGSS) chart. Shown are severity stages according to the Advanced Glaucoma Intervention Study (AGIS) scoring system, Glaucoma Severity Staging (GSS) system and eGSS. Visual field index (VFI), and total deviation and pattern deviation plots are also shown. (The examples are the same as those in Figure 1).

TABLE LEGENDS

Table A1. The Advanced Glaucoma Intervention Study (AGIS) Scoring Method.<sup>19</sup>

Table A2. The Glaucoma Severity Staging (GSS) system criteria.

Table A3. Descriptive statistics of the global indices mean defect (MD), pattern standard deviation (PSD) and visual field index (VFI) by severity stage for each classification system: (A) Advanced Glaucoma Intervention Study (AGIS) scoring system, (B) Glaucoma Severity Staging (GSS) system, (C) Enhanced Glaucoma Severity Staging (eGSS) system. (m=mean; sd=standard deviation)
